# Supplementary material for: An Overview of Aquatica Fu et al., a Phylogeny of Aquatic Fireflies Using Mitochondrial Genomes, a Description of Two New Species, and a New Record of Aquatic Fireflies in China (Coleoptera: Lampyridae: Luciolinae)
Source: MDPI journal article supplement (doi:10.3390/insects15010031), 2024-01-03
Supplement: s1 [file s1]

**Table S1.** *Aquatica* species and distribution.

| Species                                          | Mainland<br>China | Formosa<br>Taiwan/ | Japan | Location of<br>types | Larvae<br>associated | Females<br>associated | References for<br>pictures of<br>species |
|--------------------------------------------------|-------------------|--------------------|-------|----------------------|----------------------|-----------------------|------------------------------------------|
| <i>A. ficta</i> (Olivier, 1909)                  | *                 | *                  |       | MNHN                 | √                    | √                     | [1,4,13]                                 |
| <i>A. hydrophila</i> (Jeng <i>et al.</i> , 2003) |                   | *                  |       | NMNS                 | √                    | √                     | [1,16]                                   |
| <i>A. lateralis</i> (Motschulsky, 1860)          | *                 |                    | *     | ZMUM                 | √                    | √                     | [1,4,13]                                 |
| <i>A. leii</i> (Fu <i>et al.</i> 2006)           | *                 |                    |       | NHMHAU               | √                    | √                     | [1,13]                                   |
| <i>A. qingshen</i> sp. nov.                      | *                 |                    |       | NHMHAU               | √                    | √                     | This study                               |
| <i>A. wuhana</i> (Fu <i>et al.</i> 2010)         | *                 |                    |       | NHMHAU               | √                    | √                     | [1,13]                                   |
| <i>A. xianning</i> sp. nov.                      | *                 |                    |       | NHMMAU               | √                    | √                     | This study                               |

\* Distribution; √ confirmation

**Table S2.** *Aquatica* females and characteristics.

| Species                                          | 1 | 2 | 3       | 4      | 5  | 6  | 7  |
|--------------------------------------------------|---|---|---------|--------|----|----|----|
| <i>A. leii</i> (Fu <i>et al.</i> 2006)           | E | H | In cop  | strips | √  | √  | √  |
| <i>A. ficta</i> (Olivier, 1909)                  | E | H | In cop  | strips | √  | √  | √  |
| <i>A. hydrophila</i> (Jeng <i>et al.</i> , 2003) | E | H | In cop  | NI     | NI | NI | NI |
| <i>A. lateralis</i> (Motschulsky, 1860)          | E | H | In cop  | strips | √  |    |    |
| <i>A. qingshen</i> sp. nov.                      | E | H | In cop  | strips | √  |    | √  |
| <i>A. wuhana</i> (Fu <i>et al.</i> 2010)         | E | H | In cop  | strips | √  | √  | √  |
| <i>A. xianning</i> sp. nov.                      | E | H | In cop. | strips | √  |    | √  |

\* 1. Elytra. E = fully developed. 2. Hind wings. H = fully developed. 3. Evidence for association. 4. Bursa plates. 5. Median oviduct plate. 6. Spermatophore observed. 7. FAG observed. NI = not investigated.

Table S3. Matrix p-distance of 20 species of fireflies.

| Species                      | <i>Ab.anceyi</i> | <i>Ab.cerata</i> | <i>Ab.terminalis</i> | <i>Aq.ficta</i> | <i>Aq.lateralis japonese</i> | <i>Aq.lateralis chinese</i> | <i>Aq. leii</i> | <i>Aq. xianning</i> | <i>Aq. qingshen</i> | <i>Aq.wuhana</i> | <i>As. circumdata</i> | <i>C. bilineatus</i> | <i>C. costipennis</i> | <i>C. fulvocapitalis</i> | <i>L. curtithorax</i> | <i>N. cruciata</i> | <i>Pt.maipo</i> | <i>Pyg.qingyu</i> | <i>Pyr.rufa</i> | <i>S. substriata</i> |
|------------------------------|------------------|------------------|----------------------|-----------------|------------------------------|-----------------------------|-----------------|---------------------|---------------------|------------------|-----------------------|----------------------|-----------------------|--------------------------|-----------------------|--------------------|-----------------|-------------------|-----------------|----------------------|
| <i>Ab.anceyi</i>             | 0.0000           |                  |                      |                 |                              |                             |                 |                     |                     |                  |                       |                      |                       |                          |                       |                    |                 |                   |                 |                      |
| <i>Ab.cerata</i>             | 0.1940           | 0.0000           |                      |                 |                              |                             |                 |                     |                     |                  |                       |                      |                       |                          |                       |                    |                 |                   |                 |                      |
| <i>Ab.terminalis</i>         | 0.1591           | 0.1133           | 0.0000               |                 |                              |                             |                 |                     |                     |                  |                       |                      |                       |                          |                       |                    |                 |                   |                 |                      |
| <i>Aq.ficta</i>              | 0.2660           | 0.1718           | 0.1778               | 0.0000          |                              |                             |                 |                     |                     |                  |                       |                      |                       |                          |                       |                    |                 |                   |                 |                      |
| <i>Aq.lateralis japonese</i> | 0.2803           | 0.1828           | 0.1897               | 0.1280          | 0.0000                       |                             |                 |                     |                     |                  |                       |                      |                       |                          |                       |                    |                 |                   |                 |                      |
| <i>Aq.lateralis chinese</i>  | 0.2679           | 0.1769           | 0.1807               | 0.1300          | 0.0945                       | 0.0000                      |                 |                     |                     |                  |                       |                      |                       |                          |                       |                    |                 |                   |                 |                      |
| <i>Aq. leii</i>              | 0.2675           | 0.1729           | 0.1786               | 0.0036          | 0.1290                       | 0.1303                      | 0.0000          |                     |                     |                  |                       |                      |                       |                          |                       |                    |                 |                   |                 |                      |
| <i>Aq. xianning</i>          | 0.2846           | 0.1917           | 0.1954               | 0.1415          | 0.1517                       | 0.1517                      | 0.1420          | 0.0000              |                     |                  |                       |                      |                       |                          |                       |                    |                 |                   |                 |                      |
| <i>Aq. qingshen</i>          | 0.2714           | 0.1815           | 0.1857               | 0.1267          | 0.1415                       | 0.1418                      | 0.1271          | 0.1084              | 0.0000              |                  |                       |                      |                       |                          |                       |                    |                 |                   |                 |                      |
| <i>Aq.wuhana</i>             | 0.2622           | 0.1707           | 0.1791               | 0.1211          | 0.1430                       | 0.1421                      | 0.1215          | 0.1544              | 0.1395              | 0.0000           |                       |                      |                       |                          |                       |                    |                 |                   |                 |                      |
| <i>As. circumdata</i>        | 0.2925           | 0.2022           | 0.2084               | 0.2170          | 0.2270                       | 0.2219                      | 0.2181          | 0.2319              | 0.2177              | 0.2211           | 0.0000                |                      |                       |                          |                       |                    |                 |                   |                 |                      |
| <i>C. bilineatus</i>         | 0.3021           | 0.2071           | 0.2155               | 0.2238          | 0.2351                       | 0.2314                      | 0.2248          | 0.2361              | 0.2298              | 0.2244           | 0.2406                | 0.0000               |                       |                          |                       |                    |                 |                   |                 |                      |
| <i>C. costipennis</i>        | 0.3024           | 0.2015           | 0.2128               | 0.2238          | 0.2343                       | 0.2300                      | 0.2251          | 0.2400              | 0.2264              | 0.2212           | 0.2357                | 0.0814               | 0.0000                |                          |                       |                    |                 |                   |                 |                      |
| <i>C. fulvocapitalis</i>     | 0.2953           | 0.2120           | 0.2202               | 0.2292          | 0.2405                       | 0.2360                      | 0.2295          | 0.2481              | 0.2378              | 0.2274           | 0.2481                | 0.1632               | 0.1650                | 0.0000                   |                       |                    |                 |                   |                 |                      |
| <i>L. curtithorax</i>        | 0.2507           | 0.1576           | 0.1629               | 0.1740          | 0.1858                       | 0.1720                      | 0.1751          | 0.1963              | 0.1803              | 0.1792           | 0.2069                | 0.2113               | 0.2119                | 0.2197                   | 0.0000                |                    |                 |                   |                 |                      |
| <i>N. cruciata</i>           | 0.2800           | 0.1838           | 0.1883               | 0.1509          | 0.1589                       | 0.1629                      | 0.1520          | 0.1612              | 0.1513              | 0.1626           | 0.2222                | 0.2352               | 0.2336                | 0.2462                   | 0.1825                | 0.0000             |                 |                   |                 |                      |
| <i>Pt.maipo</i>              | 0.2641           | 0.1701           | 0.1772               | 0.1849          | 0.2006                       | 0.1938                      | 0.1857          | 0.2039              | 0.1941              | 0.1872           | 0.2098                | 0.1984               | 0.1949                | 0.2022                   | 0.1780                | 0.1974             | 0.0000          |                   |                 |                      |
| <i>Pyg.qingyu</i>            | 0.2151           | 0.1258           | 0.1333               | 0.1638          | 0.1804                       | 0.1685                      | 0.1642          | 0.1832              | 0.1678              | 0.1665           | 0.1947                | 0.2030               | 0.2001                | 0.2096                   | 0.1484                | 0.1757             | 0.1682          | 0.0000            |                 |                      |
| <i>Pyr.rufa</i>              | 0.3839           | 0.2981           | 0.2984               | 0.3137          | 0.3248                       | 0.3147                      | 0.3136          | 0.3253              | 0.3147              | 0.3173           | 0.3138                | 0.3130               | 0.3142                | 0.3217                   | 0.2980                | 0.3193             | 0.2984          | 0.2883            | 0.0000          |                      |
| <i>S. substriata</i>         | 0.2659           | 0.1733           | 0.1754               | 0.1827          | 0.1898                       | 0.1861                      | 0.1827          | 0.1989              | 0.1895              | 0.1876           | 0.2144                | 0.2202               | 0.2163                | 0.2259                   | 0.1751                | 0.1929             | 0.1855          | 0.1649            | 0.3097          | 0.0000               |

P-distances mentioned in main text are marked in different colours. Red in yellow shade shows genetic distance between *Aq. leii* and *Aq.ficta*; Blue in yellow shade shows genetic distance between *Aq.lateralis* Chinese and *Aq.lateralis* Japanese; green shows genetic distance between *Aq. xianning* and other firefly species; brown shows genetic distance between *Aq. qingshen* and other firefly species.
